# Supplementary material for: Effects of Sorbitan Monostearate and Stearyl Alcohol on the Physicochemical Parameters of Sunflower-Wax-Based Oleogels
Source: MDPI journal article supplement (doi:10.3390/gels8080520), 2022-08-19
Supplement: s1 [file s1]

# Effects of Sorbitan Monostearate and Stearyl Alcohol on the Physicochemical Parameters of Sunflower-Wax-Based Oleogels

## 1. Preparation of oleogels

All the oleogel formulation appeared whitish with a good spreadability when touched with hands. The molten oleogel samples were kept at 25 °C, post which they were evaluated for their successful oleogel formation. This was done through the tube inversion method (Figure S1), where the formulated gels were kept inverted in glass bottles. Once the oleogel were formed, they were stored at 4 °C.

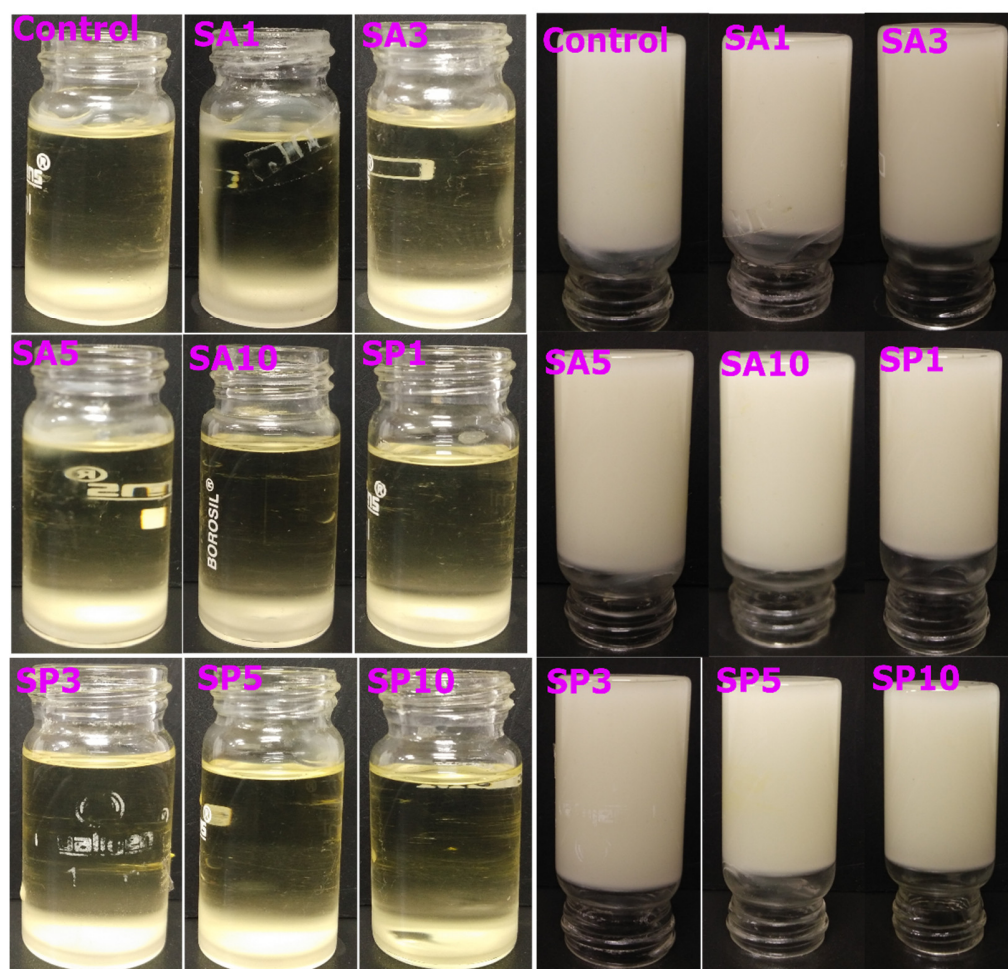

**Figure S1.** Inverted tube method to confirm oleogel formation.

## 2. Microscopy

### 2.1 Surface Topology

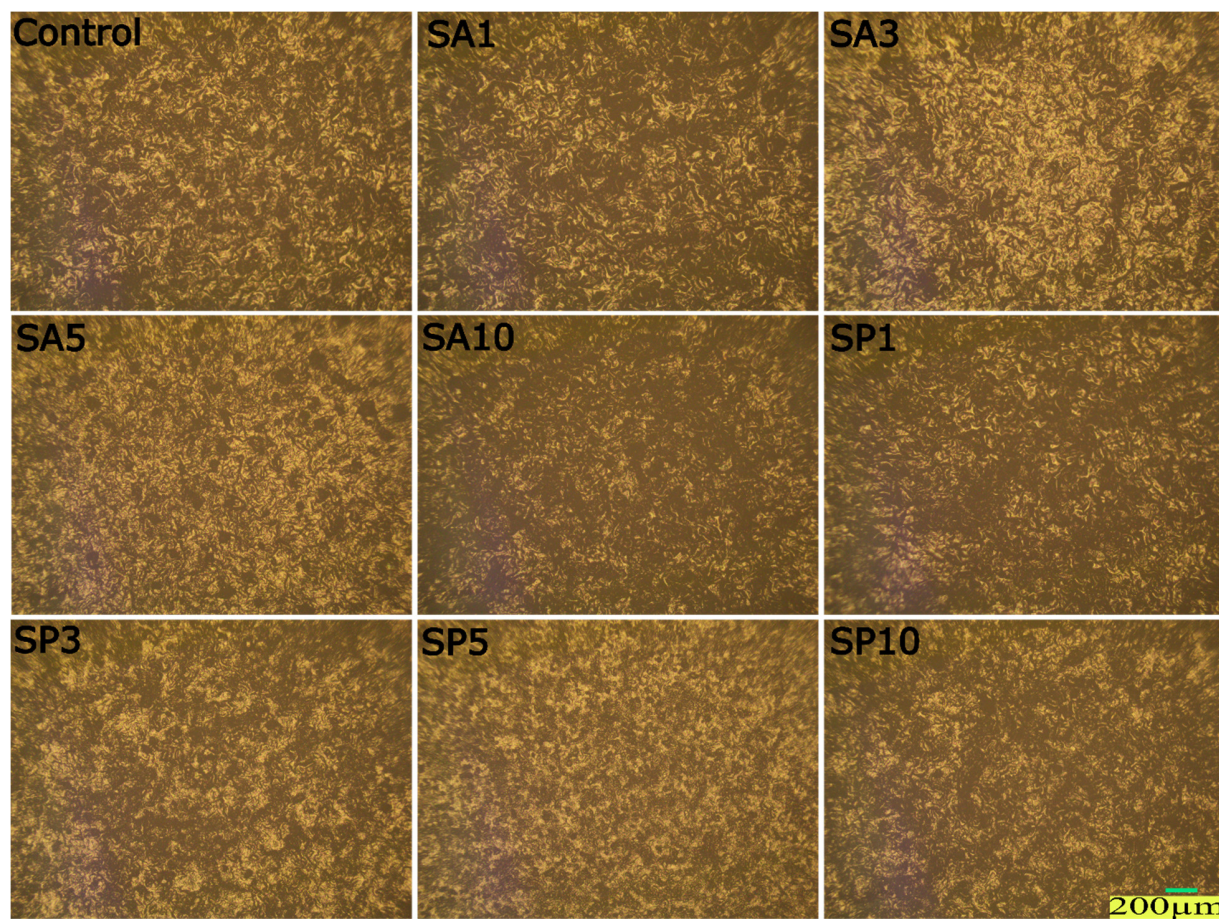

**Figure S2.** Surface topology images of oleogels through the metallurgical microscope.

## 2.2 Microstructural arrangement

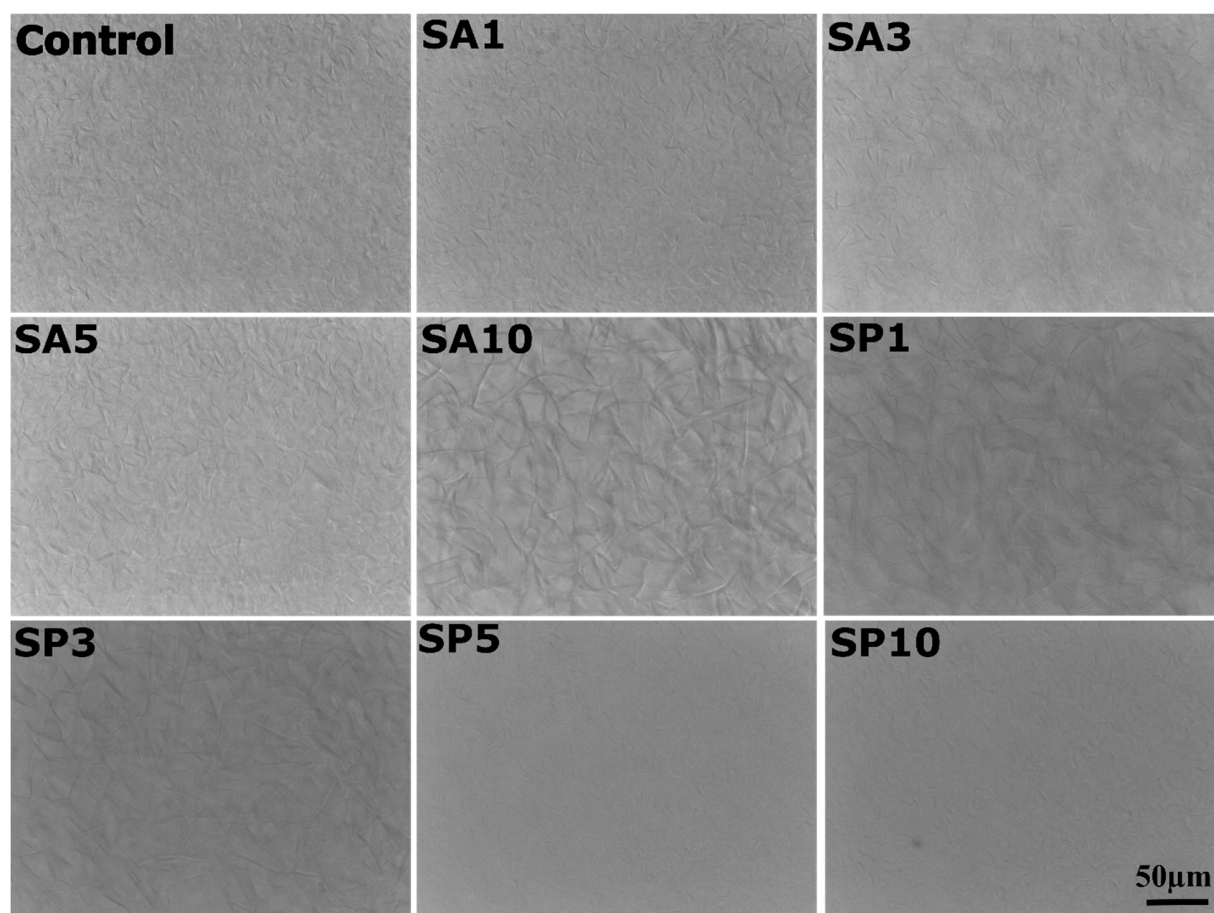

**Figure S3.** Bright-field micrograph of oleogels displaying fiber morphology of fat crystals.



### 3. XRD analysis

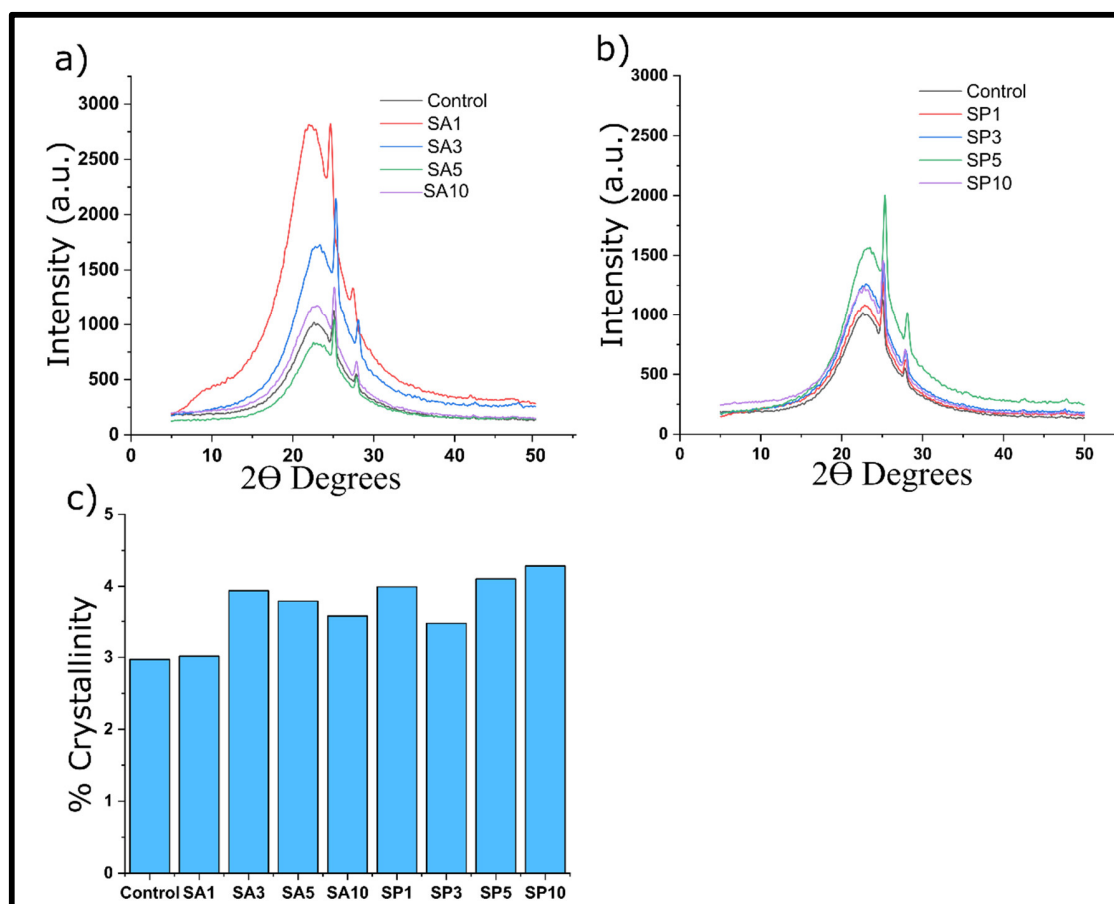

**Figure S4.** XRD of a) SA b) SP incorporated oleogels; c) Quantification of % crystallinity among the oleogels.

#### 4. FTIR Analysis

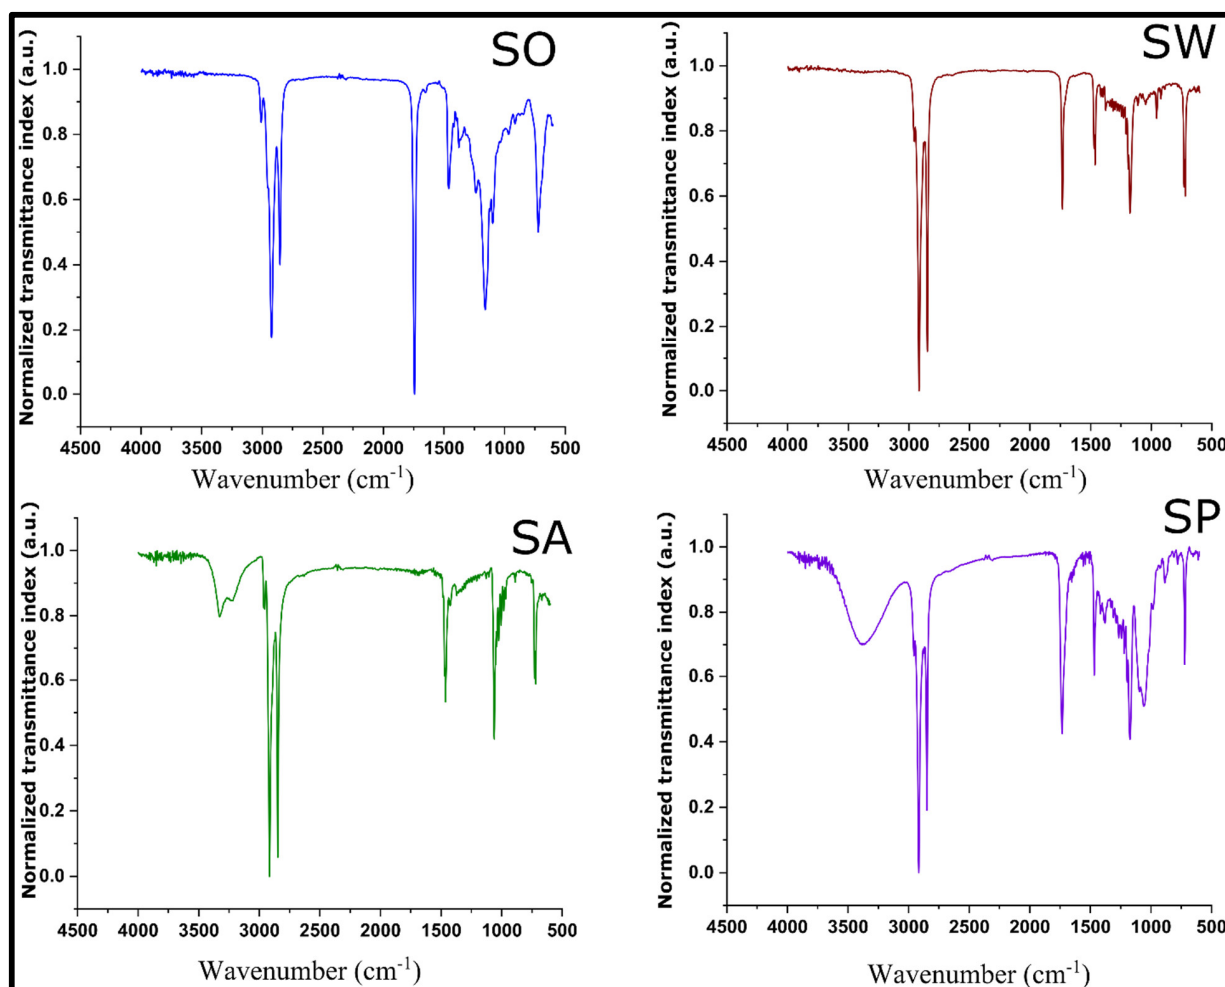

**Figure S5.** FTIR spectra of raw components used for oleogel synthesis.

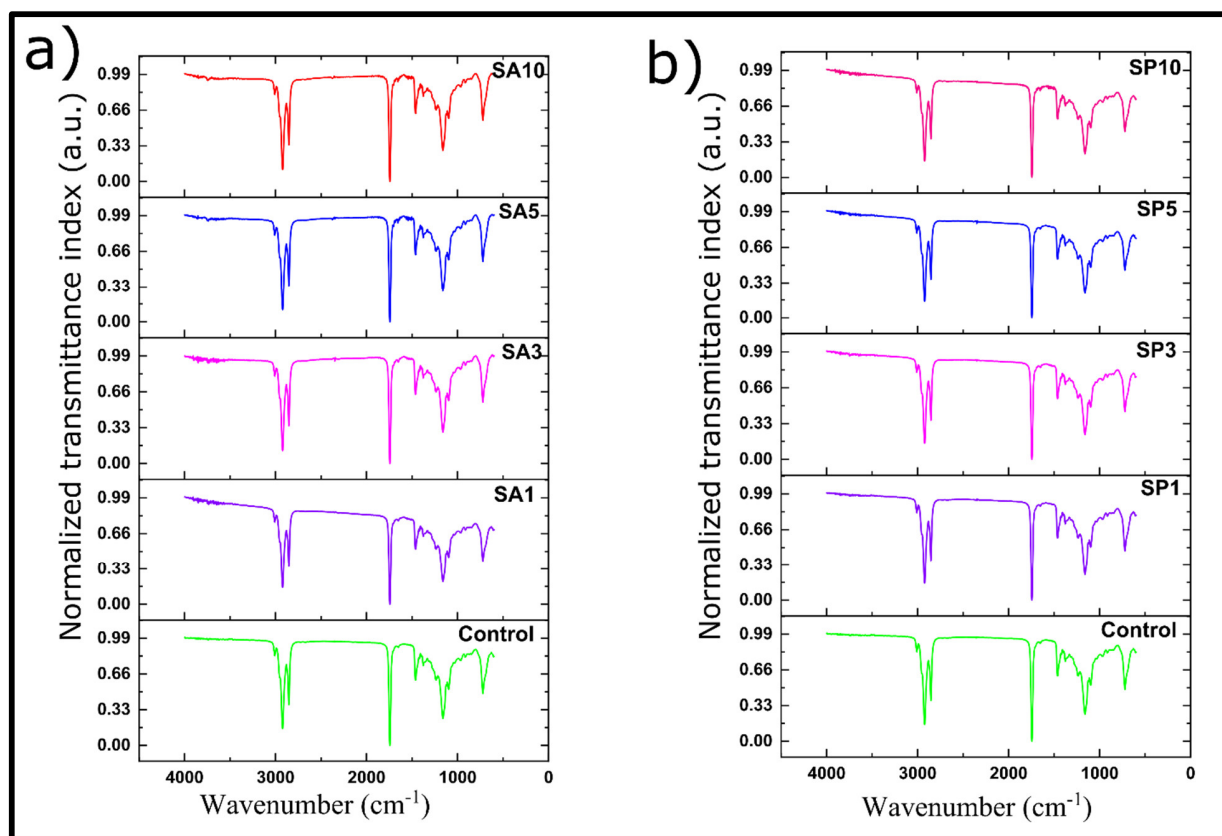

**Figure S6.** FTIR spectra of a) SA incorporated oleogels, and b) SP incorporated oleogels.

## 5. Crystallisation kinetics

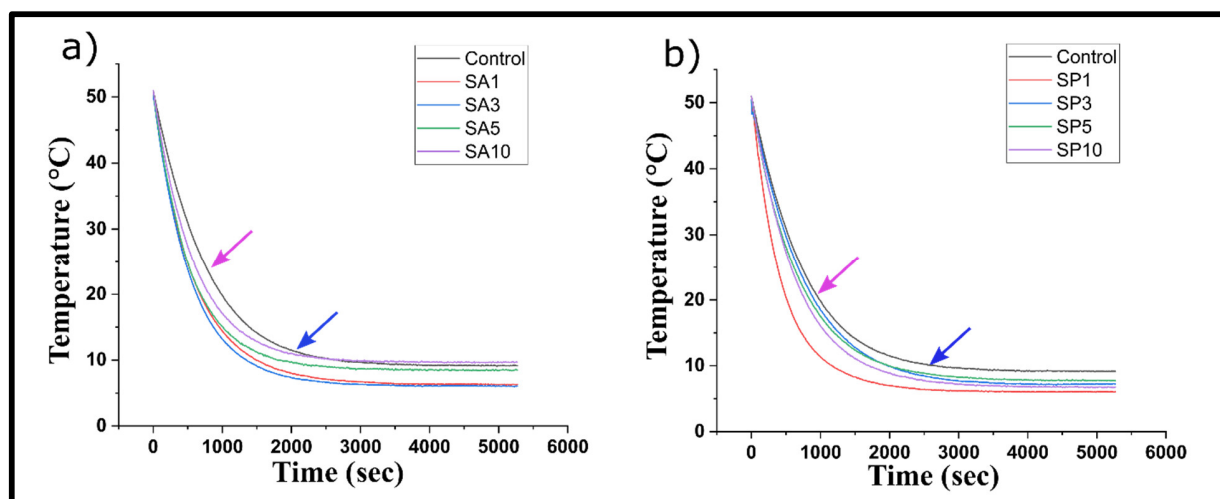

**Figure S7.** Crystallisation curves a) SA incorporated oleogels b) SP incorporated oleogels.

## 6. Differential Scanning Calorimetry

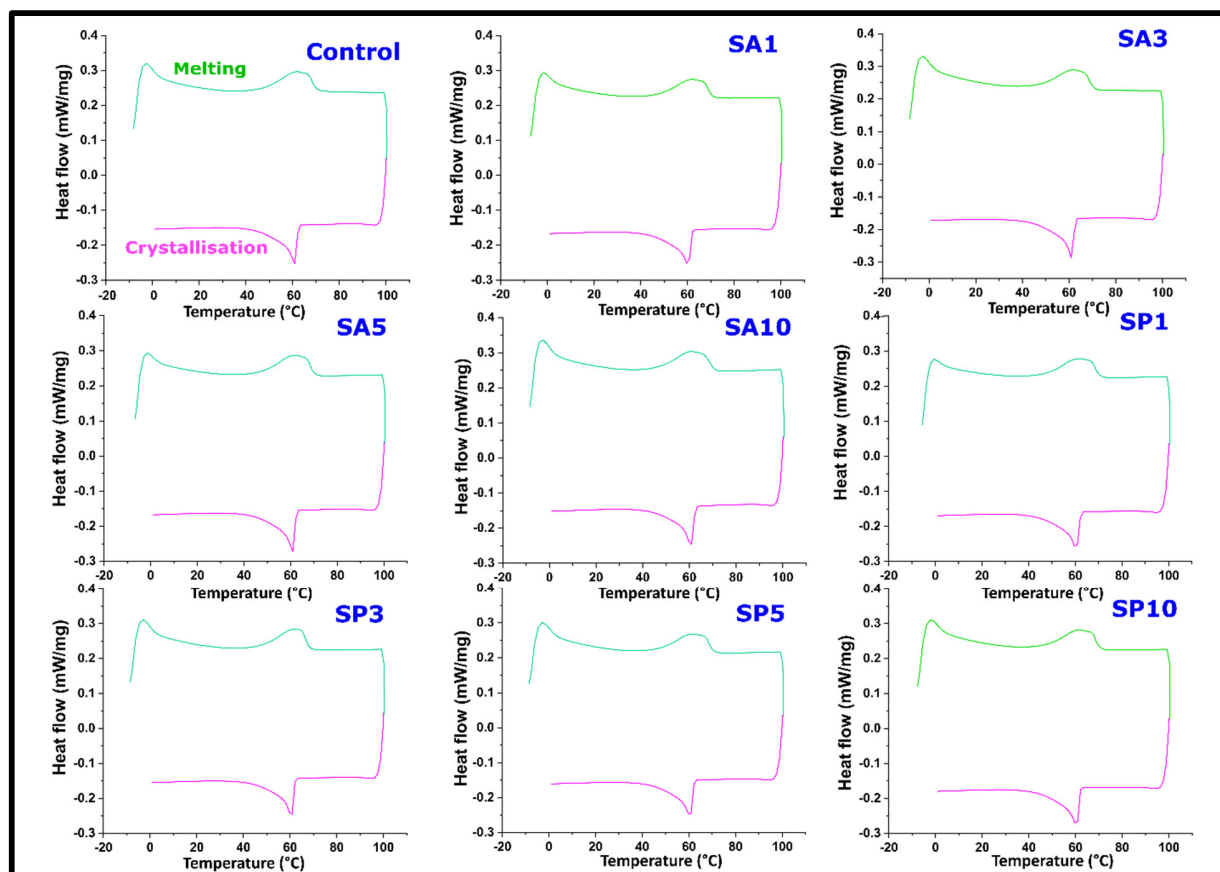

**Figure S8.** DSC thermograms of emulsifier incorporated oleogels.



## 7. Mechanical Analysis

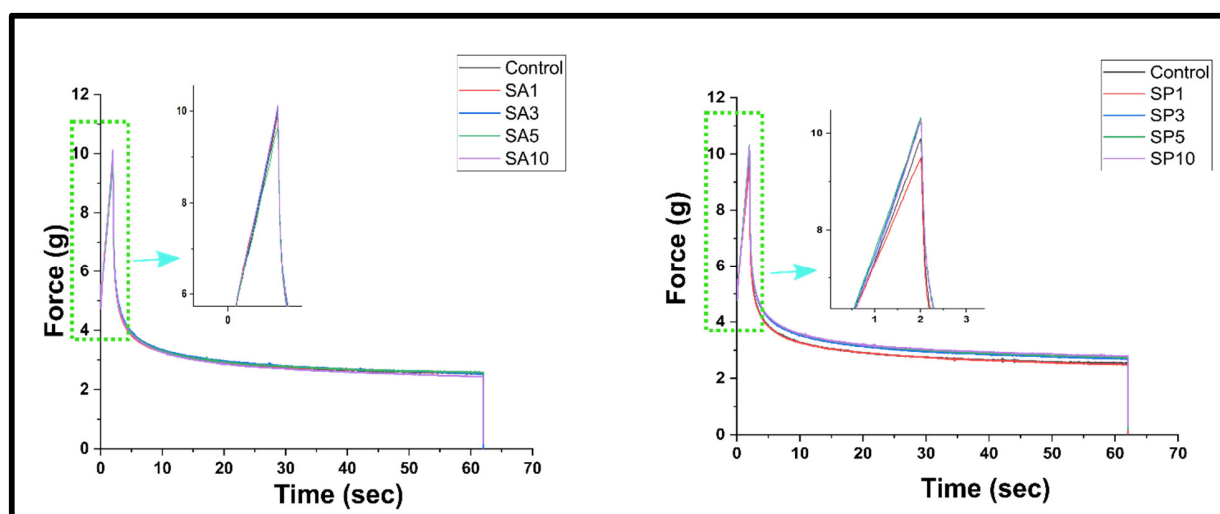

**Figure S9.** Stress relaxation profile of a) SA incorporated oleogels b) SP incorporated oleogels.

**Supplementary Table S1.** Parameters of stress relaxation curve.

| Formulation | $F_0$            | $F_R$           | %SR        |
|-------------|------------------|-----------------|------------|
| Control     | $9.98 \pm 0.76$  | $2.46 \pm 0.27$ | 75.27 2.12 |
| SA1         | $10.21 \pm 0.64$ | $2.66 \pm 0.24$ | 74.00 1.56 |
| SA3         | $10.16 \pm 0.61$ | $2.55 \pm 0.23$ | 74.86 2.56 |
| SA5         | $10.04 \pm 0.77$ | $2.49 \pm 0.25$ | 75.59 3.29 |
| SA10        | $10.18 \pm 0.51$ | $2.48 \pm 0.29$ | 73.67 2.73 |
| SP1         | $9.49 \pm 0.54$  | $2.49 \pm 0.24$ | 72.67 2.73 |
| SP3         | $10.07 \pm 0.55$ | $2.76 \pm 0.19$ | 72.55 2.33 |
| SP5         | $10.08 \pm 0.46$ | $2.70 \pm 0.15$ | 73.24 1.44 |
| SP10        | $10.57 \pm 0.92$ | $2.72 \pm 0.22$ | 74.07 3.21 |
